# Supplementary material
Source: HighWire-hosted journal article supplement (https://bmjopen.bmj.com/content/10/9/e038473)
Supplement: inline-supplementary-material-1 [file inline-supplementary-material-1.pdf]

## Appendix A

## Questions Regarding Physical Activity

**How often do you do VIGOROUS leisure-time physical activities for AT LEAST 10 MINUTES that cause HEAVY sweating or LARGE increases in breathing or heart rate?**

**Number of units**

Never  
1-999 times  
Unable to do this type of activity  
Refused  
Not Ascertained  
Don't Know

**How often do you do VIGOROUS leisure-time physical activities for AT LEAST 10 MINUTES that cause HEAVY sweating or LARGE increases in breathing or heart rate?**

**Time Units**

Never  
Per day  
Per week  
Per month  
Per year  
Refused  
Not Ascertained  
Don't Know

**About how long do you do these vigorous leisure-time physical activities each time?**

**Number Time Units**

1-995  
Refused  
Not Ascertained  
Don't Know

**About how long do you do these vigorous leisure-time physical activities each time?**

**Time Units**

Minutes  
Hours  
Refused  
Not Ascertained  
Don't Know

**How often do you do LIGHT OR MODERATE leisure-time physical activities for AT LEAST 10 MINUTES that cause ONLY LIGHT sweating or a SLIGHT to MODERATE increase in breathing or heart rate?**

**Number Units**

Never  
1-995 times  
Unable to do this type of activity  
Refused  
Not Ascertained  
Don't Know

**How often do you do LIGHT OR MODERATE leisure-time physical activities for AT LEAST 10 MINUTES that cause ONLY LIGHT sweating or a SLIGHT to MODERATE increase in breathing or heart rate?**

**Time Units**

Never  
Per day  
Per week  
Per month  
Per year  
Refused  
Not Ascertained  
Don't Know

**About how long do you do these light or moderate leisure-time physical activities each time?**

**Time Units**

1-995  
Unable to do this type of activity  
Refused  
Not Ascertained  
Don't Know

**About how long do you do these light or moderate leisure-time physical activities each time?**

**Time Units**

Minutes  
Hours  
Refused  
Not Ascertained  
Don't Know
